# Supplementary material for: Intestinal Candida parapsilosis isolates from Rett syndrome subjects bear potential virulent traits and capacity to persist within the host
Source: PubMed Central journal article supplement (PMC5930502; doi:10.1186/s12876-018-0785-z), 2018-05-02

Jaccard distance

0.0 0.2 0.4 0.6 0.8

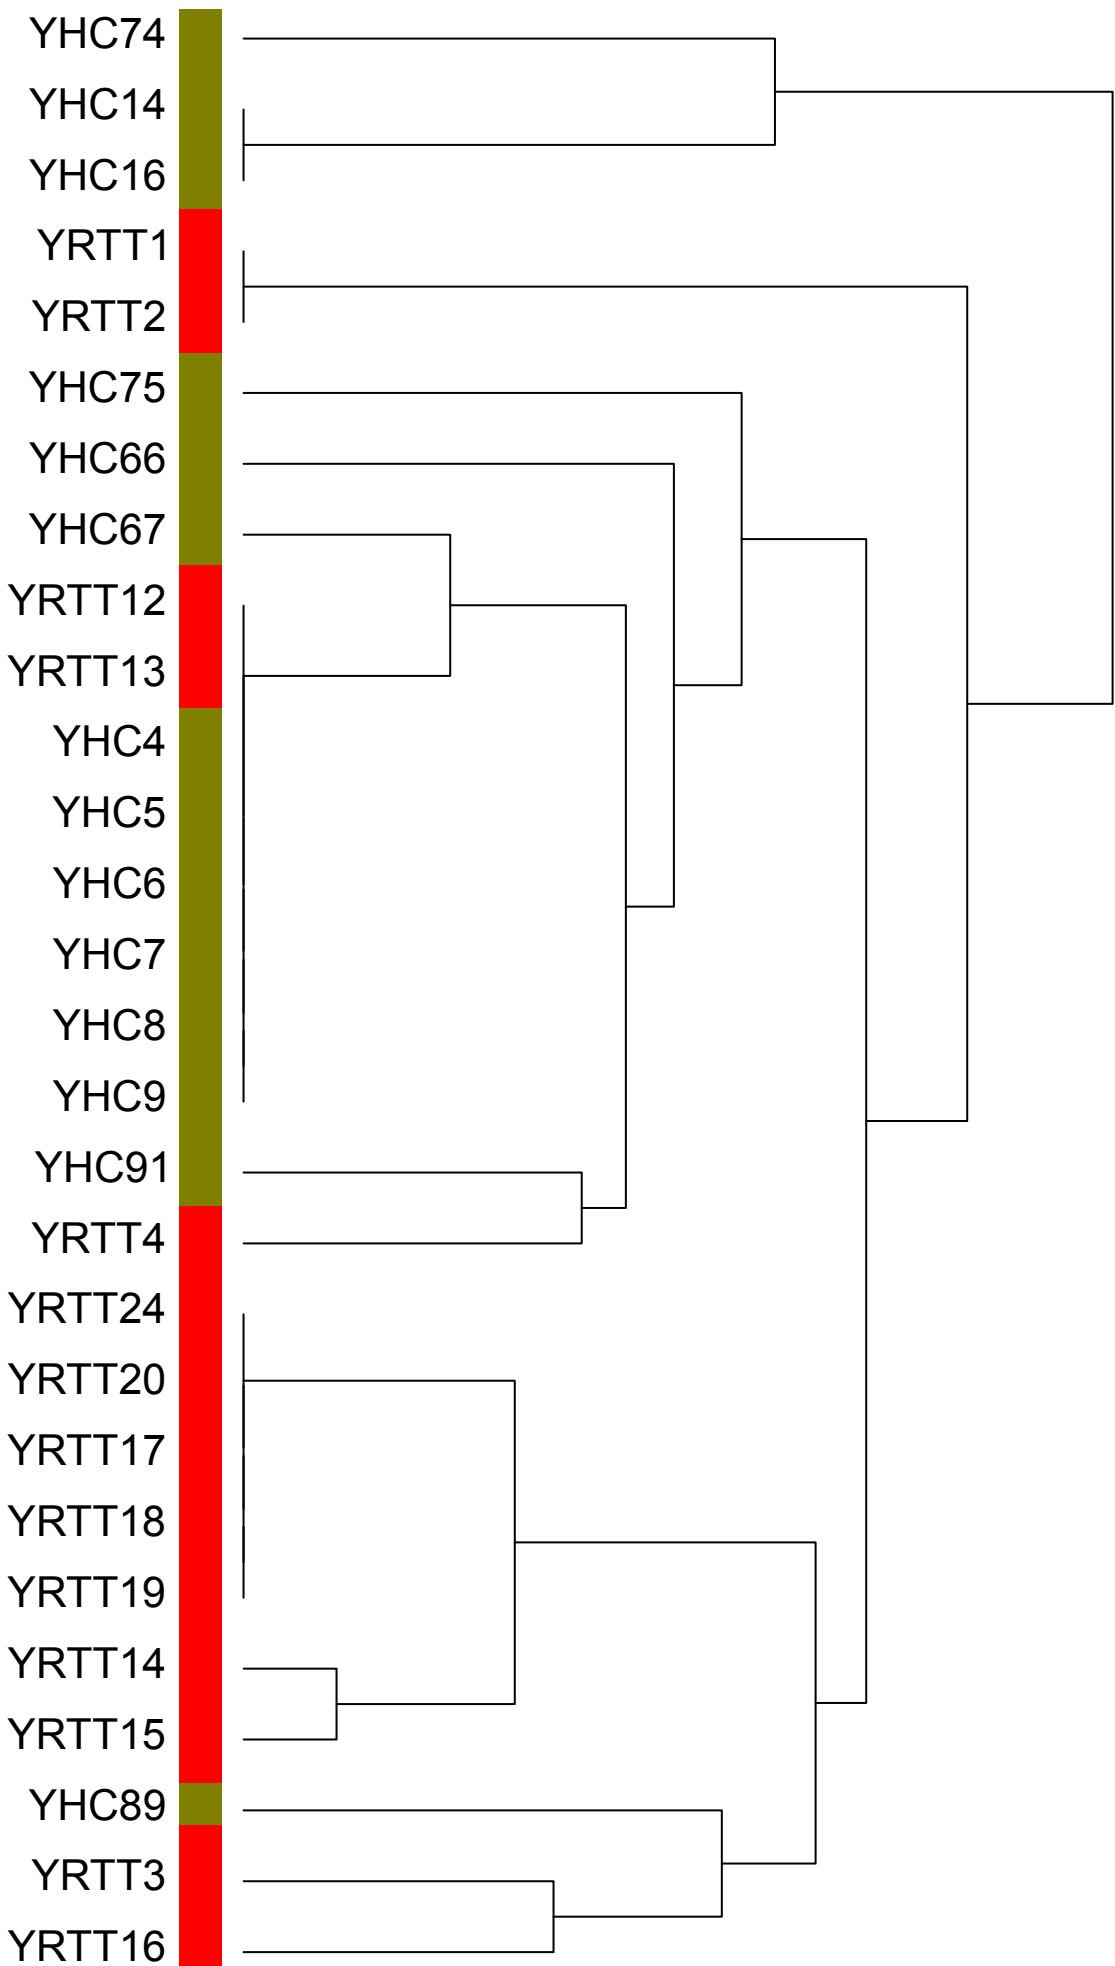

Supplement: 12876_2018_785_MOESM4_ESM.pdf [file 12876_2018_785_MOESM4_ESM.pdf]
