# Supplementary material for: Intestinal Candida parapsilosis isolates from Rett syndrome subjects bear potential virulent traits and capacity to persist within the host
Source: Springer Nature journal article supplement (doi:10.1186/s12876-018-0785-z), 2018-05-02

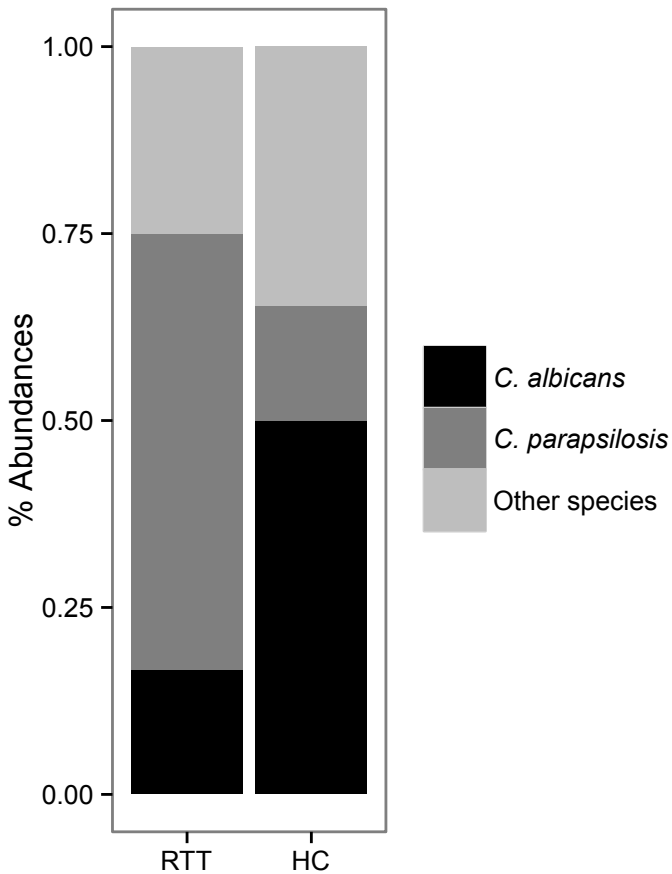

Supplement: MOESM2 [file 15733084]
