# Supplementary material for: Intestinal Candida parapsilosis isolates from Rett syndrome subjects bear potential virulent traits and capacity to persist within the host
Source: Springer Nature journal article supplement (doi:10.1186/s12876-018-0785-z), 2018-05-02

Jaccard distance

0.0 0.2 0.4 0.6 0.8 1.0

SC5314  
YHC69  
YHC61  
YHC63  
YHC70  
YHC51  
YHC64  
YHC28  
YHC58  
YHC54  
YHC56  
YHC45  
YHC48  
YHC50  
YHC53  
YRTT7  
YHC60  
YHC62  
YHC83  
YHC81  
YRTT5  
YRTT6  
YHC86  
YHC78  
YHC79  
YHC77  
YHC76  
YHC72  
YHC73  
YHC2  
YHC3  
YHC97  
YHC98  
YHC55  
YHC65  
YHC43  
YHC93  
YHC94  
YHC95  
YHC96  
YRTT11

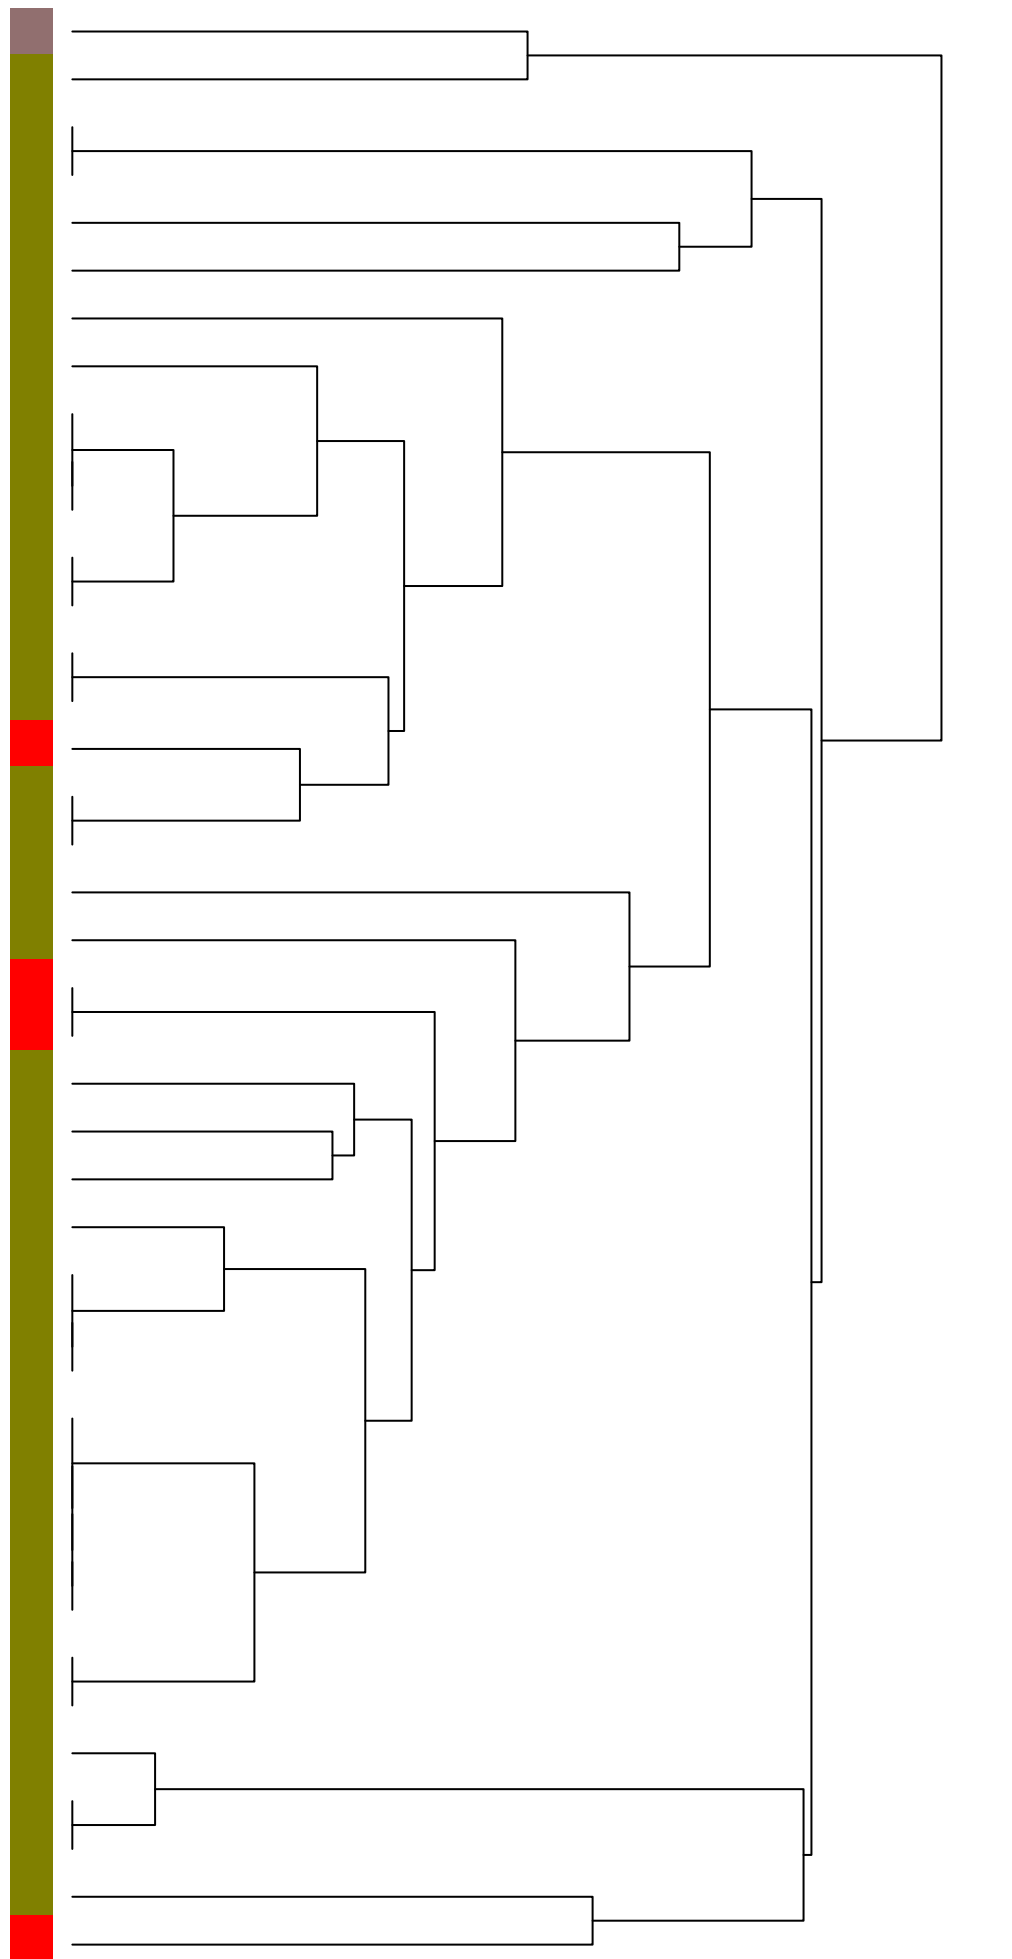

Supplement: MOESM5 [file 15733084]
